# Supplementary material for: Synthesis, structural characterization, and electrochemical performance of nanocast mesoporous Cu-/Fe-based oxides
Source: Royal Society of Chemistry journal article supplement (doi:10.1039/c3ta14111j), 2013-12-16
Supplement: c3ta14111j.pdf [file c3ta14111j.pdf]

## Supplementary Information

### **Synthesis, Structural Characterization, and Electrochemical Performance of Nanocast Mesoporous Cu-/Fe-based Oxides**

Feng Jiao,<sup>\*,a</sup> Hoang Yen,<sup>b</sup> Gregory S. Hutchings,<sup>a</sup> Bryan Yonemoto,<sup>a</sup> Qi Lu,<sup>a</sup> and Freddy Kleitz<sup>\*,b</sup>

<sup>a</sup> Center for Catalytic Science & Technology, Department of Chemical Engineering, University of Delaware, Newark, DE, 19716 USA. Fax: +1-302-831-1048; Tel: +1-302-831-3679; E-mail: jiao@udel.edu

<sup>b</sup> Department of Chemistry and Centre de Recherche sur les Matériaux Avancés (CERMA), Université Laval, Quebec GIV 0A6, QC, Canada. Fax: +1-418-656-7916; Tel: +1-418-656-7812; E-mail: freddy.kleitz@chm.ulaval.ca

**Synthesis of mesoporous silica MCM-48:** The MCM-48 nanospheres were synthesized using a mixture of cetyltrimethylammonium bromide (CTAB) and ethanol as a structure-directing mixture.<sup>S1</sup> Tetraethyl orthosilicate (TEOS) and triblock copolymer F127 (Pluronic F127, EO<sub>106</sub>PO<sub>70</sub>EO<sub>106</sub>) were applied as a silica source and a particle dispersion agent, respectively. The molar composition of the reaction mixture was of 1 TEOS/ 0.16 CTAB/ 10.4 NH<sub>3</sub>/ 89 EtOH/ 676 H<sub>2</sub>O/ 0.017 F127. A typical preparation of the MCM-48 nanospheres is as follows: 1g of CTAB and 4g of F127 are dissolved in 85ml of EtOH, and 212.8 ml of 2.9 wt% ammonium hydroxide solution at room temperature. After complete dissolution, 3.6g of TEOS is added into the mixture at once. After 1 min of mechanical stirring at 1000 rpm, the mixture was kept at a static condition for 24 h at RT for further silica condensation. The white solid product is recovered by ultrahigh speed centrifuge, washed with water, and dried at 70°C in air. The final template free MCM-48 nanosphere materials are obtained after calcination at 550°C for 5h in the air.

**Synthesis of mesoporous silica SBA-15:**<sup>S2</sup> The synthesis was performed with the following initial molar gel composition: 1 TEOS/ 0.55 HCl/ 0.017 P123/ 100 H<sub>2</sub>O. In a typical synthesis, 8.0 g of Pluronic P123 was dissolved in 145.4 g of deionized water and 4.4 g of hydrochloric acid (37%) at 35°C under magnetic stirring. Then, 17.2 g of TEOS was rapidly added to the initial homogeneous solution. The resulting mixture was stirred for 24 h at 35°C and subsequently hydrothermally treated for an additional 24h at 100°C to ensure further framework condensation. The solid product was filtered without washing and dried for 24h at 100°C. For template removal, the as-synthesized silica powders were first shortly slurried in an ethanol-HCl mixture and subsequently calcined at 550 °C for 3 h.

**Synthesis of mesoporous silica KIT-6:**<sup>S3</sup> Briefly, 8.0 g of Pluronic P123 (EO<sub>20</sub>PO<sub>70</sub>EO<sub>20</sub>, Sigma-Aldrich) was dissolved in 290 g of distilled water and 14.75 g of HCl (37%) under vigorous stirring. After complete dissolution, 8.0 g of 1-butanol was added. The mixture was left under stirring at 35 °C for 1 h, after which 20.63 g of tetraethoxysilane (TEOS) was added to the homogeneous clear solution. The synthesis is carried out in a closed polypropylene bottle. The molar composition of the starting reaction mixture is 1 TEOS/ 0.014 P123/ 1.54 HCl/ 165.6 H<sub>2</sub>O/ 1.11 BuOH. This mixture was left under stirring at 35°C for 24 h, followed by an aging step at 100°C or 40°C for 24 h under static. The resulting solid products were then filtered and dried for 24h at 100°C. The solid product was then filtered, dried, and finally calcined at 550°C for 3h.

## References

- S1. (a) T.-W. Kim, P.-W. Chung, V. S.-Y. Lin, *Chem. Mater.* 2010, **22**, 5093-5104. (b) R. Guillet-Nicolas, J.-L. Bridot, Y. Seo, M.-A. Fortin and F. Kleitz, *Adv. Func. Mater.*, 2011, **21**, 4653-4662.
- S2. M. Choi, W. Heo, F. Kleitz and R. Ryoo, *Chem. Commun.*, 2003, 1340-1341.
- S3. (a) F. Kleitz, S. H. Choi and R. Ryoo, *Chem. Commun.*, 2003, 2136-2137; (b) F. Kleitz, F. Bérubé, R. Guillet-Nicolas, C. M. Yang and M. Thommes, *J. Phys. Chem. C* 2010, **114**, 9344-9355.

### **Supplementary Table**

**Table S1** Estimated crystal sizes from PXRD results using the Scherrer formula for mesoporous CFOs.

| Material      | Size (nm, spinel phase) | Size (nm, $\alpha$ -Fe <sub>2</sub> O <sub>3</sub> ) | Size (nm, CuO) |
|---------------|-------------------------|------------------------------------------------------|----------------|
| CFO-MCM-48    | 8.2±0.4                 | N/A                                                  | N/A            |
| CFO-SBA-15    | N/A                     | 23.0±0.4                                             | 19.1±0.3       |
| CFO-KIT-6-100 | N/A                     | 21.8±0.4                                             | 18.3±0.3       |
| CFO-KIT-6-40  | N/A                     | 19.7±0.3                                             | 24.8±0.4       |

### Supplementary Figures

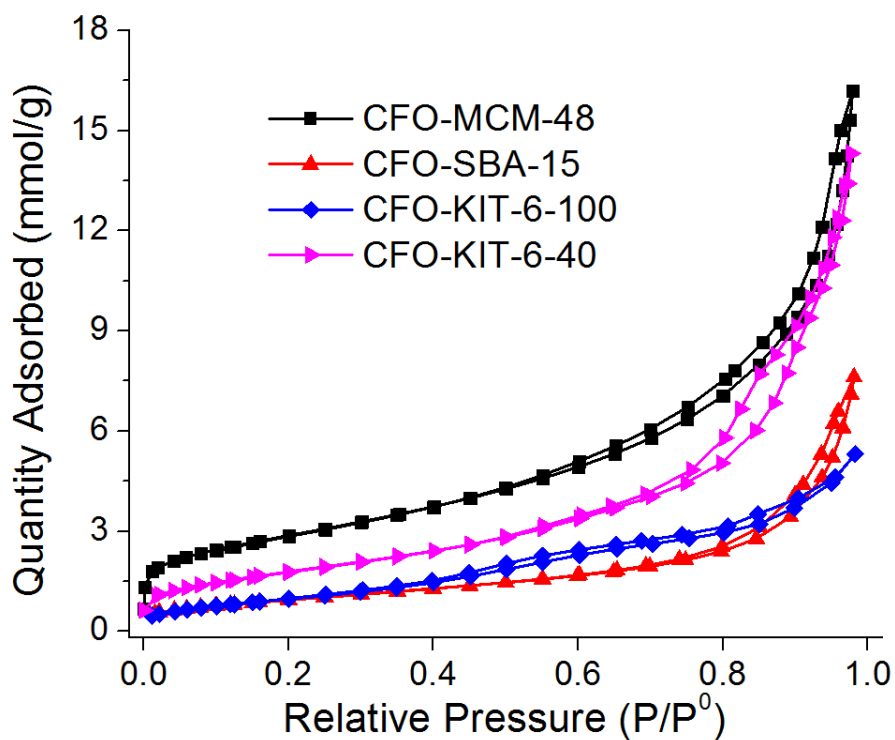

Figure S1. N<sub>2</sub> adsorption-desorption isotherms for mesoporous CFOs (-196°C).

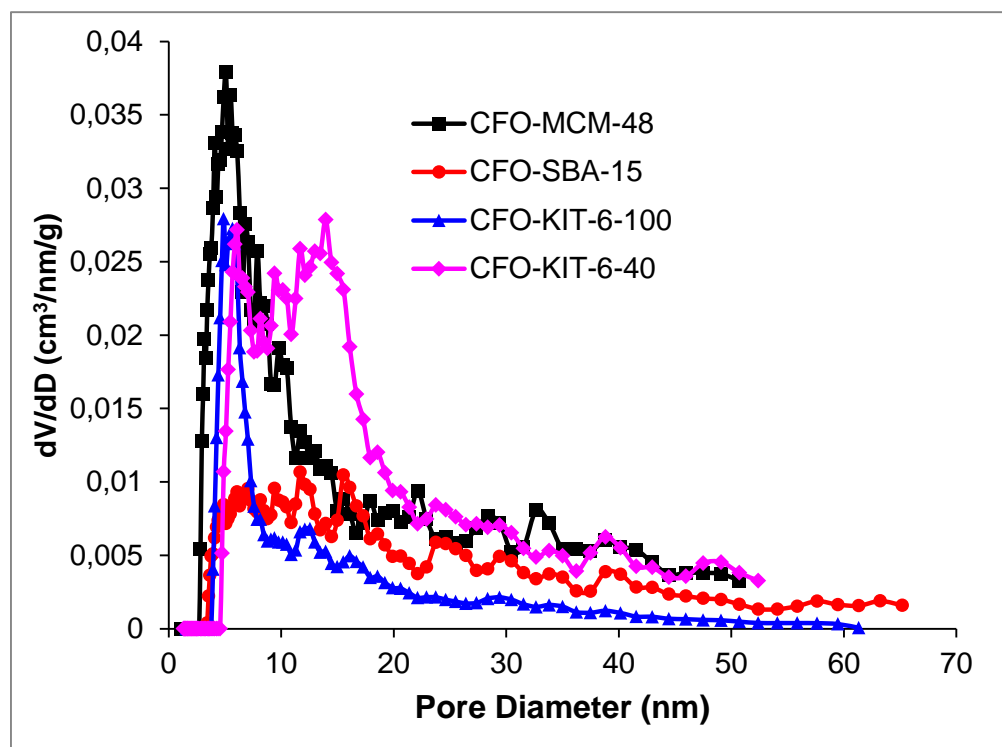

Figure S2. Pore size distributions for mesoporous CFOs calculated using NLDFT method (adsorption branch).

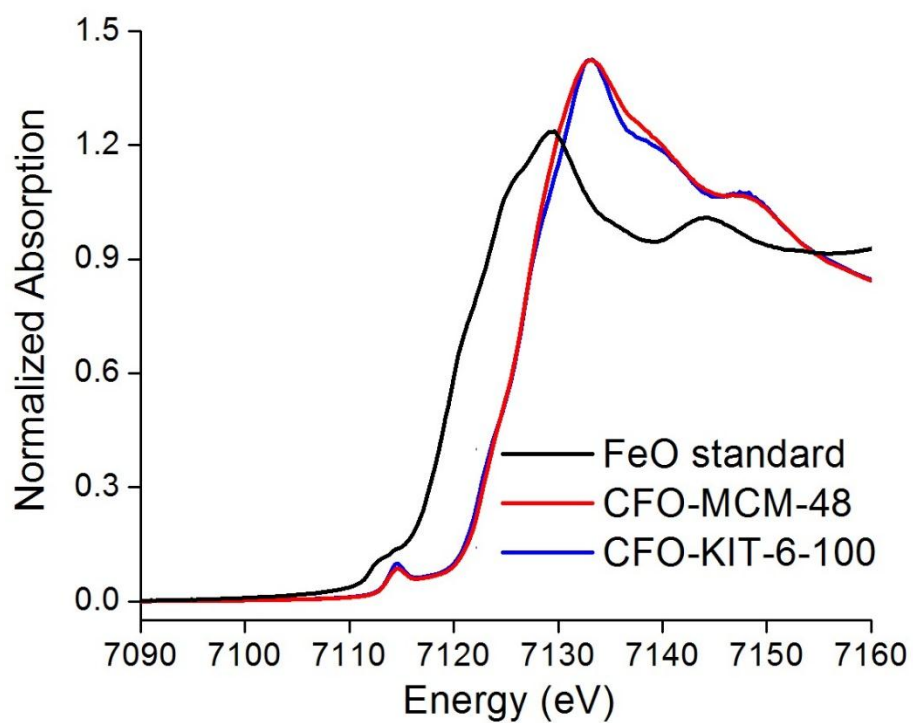

Figure S3. Fe K-edge XANES data for mesoporous CFOs. Data for bulk FeO are also included as a reference.

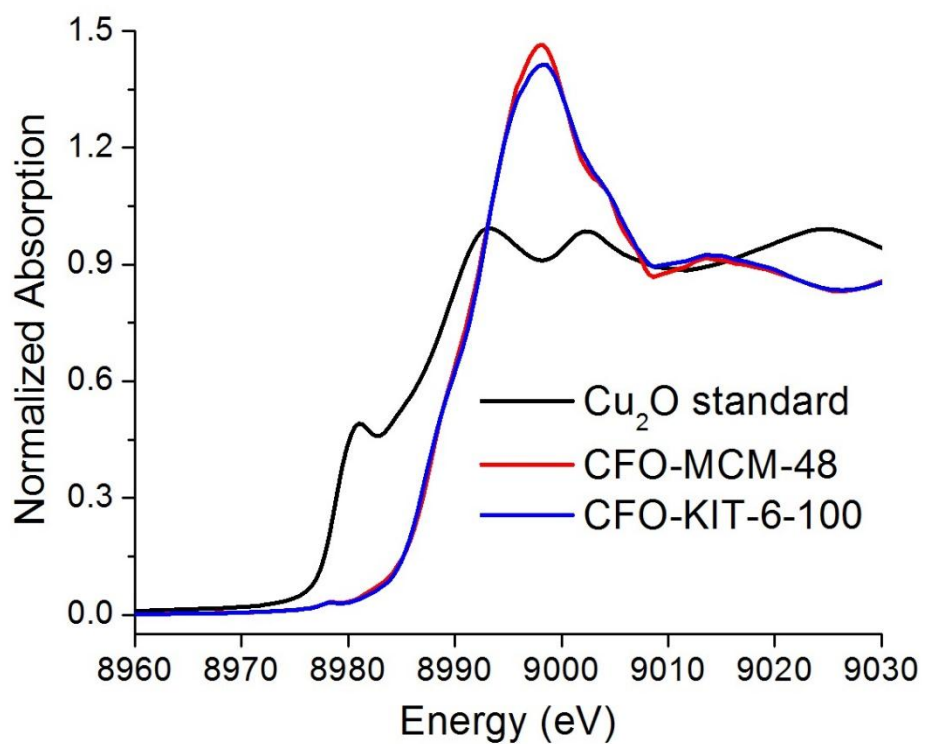

Figure S4. Cu K-edge XANES data for mesoporous CFOs. Data for bulk Cu<sub>2</sub>O are also included as a reference.

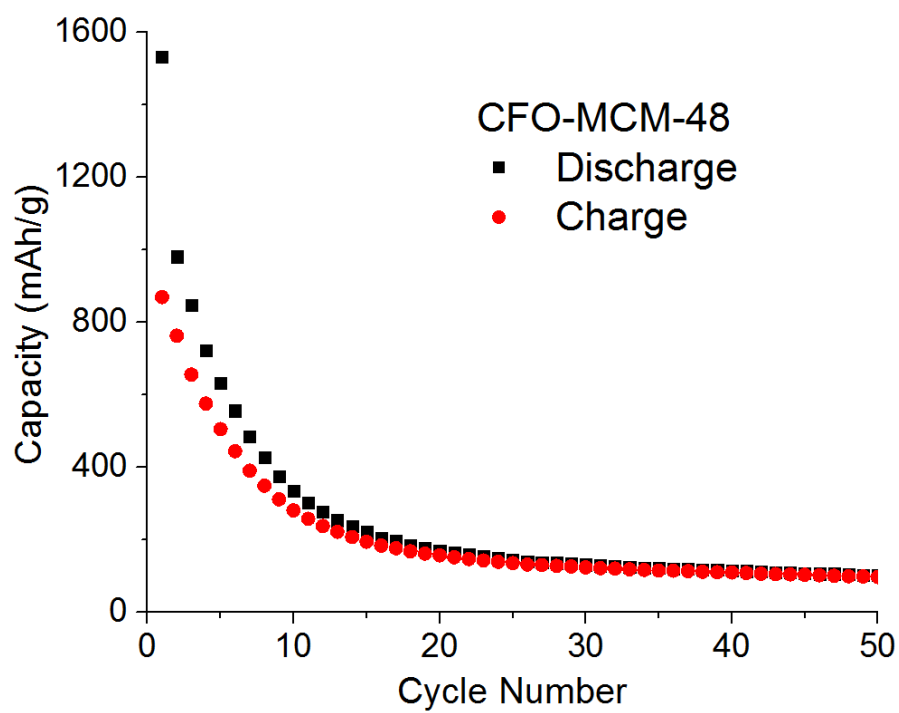

Figure S5. Cycling data for CFO-MCM-48 between 0.005-3V at a current density of 100 mA g<sup>-1</sup>.
